# Supplementary material for: Se-methylselenocysteine ameliorates mitochondrial function by targeting both mitophagy and autophagy in the mouse model of Alzheimer's disease
Source: Royal Society of Chemistry journal article supplement (doi:10.1039/d4fo00520a), 2024-01-01
Supplement: d4fo00520a1.pdf [file d4fo00520a1.pdf]

ARTICLE

## Se-Methylselenocysteine Ameliorates Mitochondrial Function by Targeting both Mitophagy and Autophagy in the Model of Alzheimer's Mice

Yongli Xie,<sup>a</sup> Xiaoshan Ke,<sup>a</sup> Zhencong Ye,<sup>a</sup> Xuexia Li,<sup>a</sup> Zetao Chen,<sup>a</sup> Jiantao Liu,<sup>a</sup> Ziyi Wu,<sup>a</sup> Qiong Liu,<sup>a,b</sup> and Xiubo Du<sup>a\*</sup>

### Supplementary

**Table S1 Antibody information**

| Antibody        | Application | Source      | NO.        |
|-----------------|-------------|-------------|------------|
| AKT             | WB          | Abcam       | ab179463   |
| p-AKT           | WB          | Abcam       | ab81283    |
| mTFA            | WB          | SantaCruz   | sc-23588   |
| NRF1            | WB          | SantaCruz   | sc-33771   |
| NRF2            | WB          | SantaCruz   | sc-365949  |
| PDHE $\alpha$   | WB          | Abcam       | ab168379   |
| COX IV          | WB          | Abcam       | ab16056    |
| VDAC1           | WB, IF      | proteintech | 66345-1-Ig |
| ND1             | WB          | SantaCruz   | sc-20493   |
| Mfn2            | WB          | Abcam       | ab124773   |
| DRP1            | WB          | Abcam       | ab184247   |
| Fis1            | WB          | Abcam       | ab229969   |
| Parkin          | WB          | SantaCruz   | sc-32282   |
| PINK1           | WB          | Abcam       | ab23707    |
| TOMM20          | WB          | Abcam       | ab283317   |
| GAPDH-HRP       | WB          | Abways      | ab2000     |
| Ras             | WB          | Abcam       | ab52939    |
| Raf             | WB          | Abcam       | ab33899    |
| MEK1/2          | WB          | CST         | 8727T      |
| p-MEK1/2        | WB          | CST         | 9154T      |
| ERK1/2          | WB          | Abcam       | ab17942    |
| p-ERK1/2        | WB          | Abcam       | ab214362   |
| mTOR            | WB          | CST         | 2972S      |
| p-mTOR          | WB          | CST         | 2971S      |
| P70s6K          | WB          | CST         | 9202S      |
| p-P70s6K        | WB          | CST         | 9205S      |
| LC3             | WB, IF      | Abcam       | ab51520    |
| LAMP            | IF          | Abcam       | ab24170    |
| Beclin-1        | WB          | CST         | 3495S      |
| AMPK $\alpha$   | WB          | CST         | 2532S      |
| p-AMPK $\alpha$ | WB          | CST         | 2535S      |
| SQSTM1/P62      | WB          | CST         | 5114S      |
| CatD            | WB          | CST         | 2284S      |
| BNIP3           | WB          | Abcam       | ab109362   |
| NIX             | WB          | SantaCruz   | ab155010   |

|                |    |             |            |
|----------------|----|-------------|------------|
| PI3K           | WB | Abcam       | ab86714    |
| $\beta$ -actin | WB | proteintech | 66009-1-Ig |

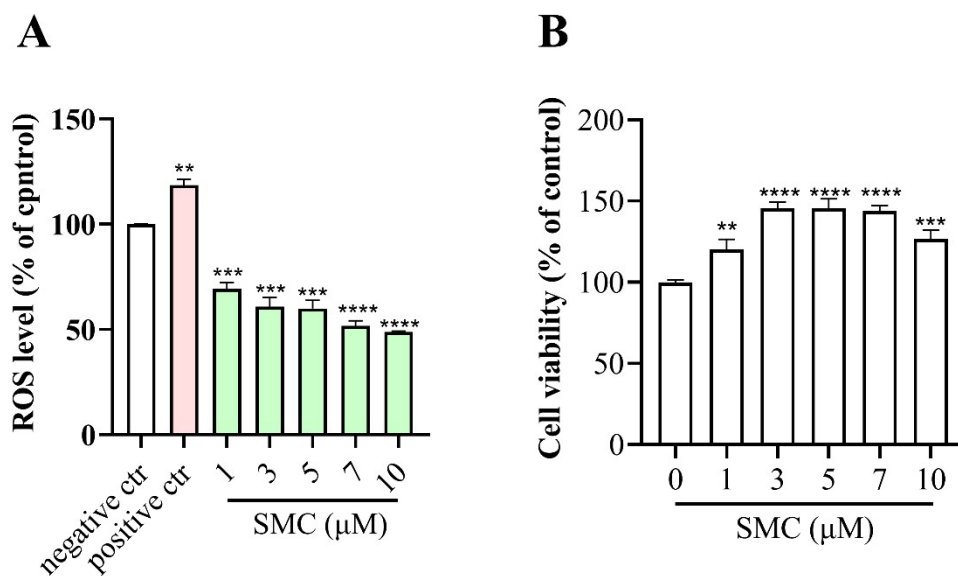

Figure S1 The ROS level (A) and the cell viability (B) of N2a-SW cells with SMC treatment. \*\*\* $p < 0.001$ ,  $n > 3$ .

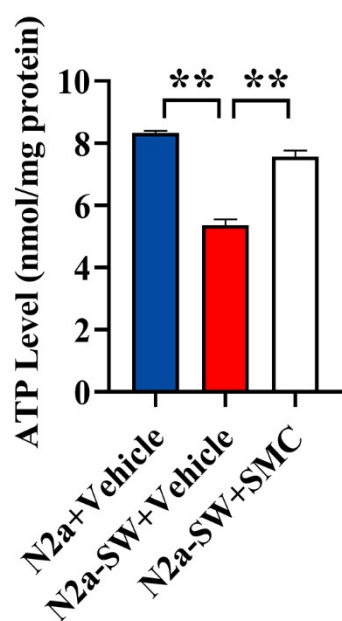

Figure S2 ATP level test in N2a-SW cell with SMC treatment for 24 h. \*\* $p < 0.01$ ,  $n > 3$ .

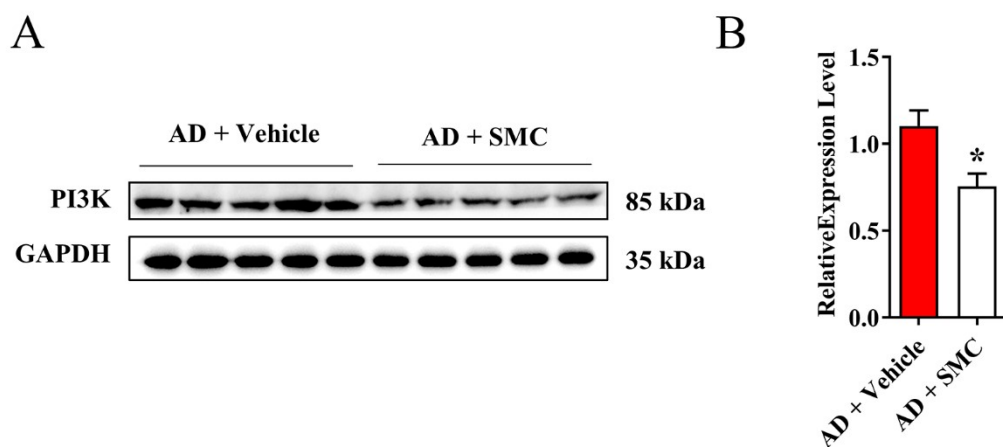

**Figure S3** Representative western blots analysis of autophagy-related protein PI3K in the cortex of 12-month-old mice. (B) Quantitative analyses of the data in (A). (means  $\pm$  SEMs), \* $p$  < 0.01,  $n$  = 5 mice.

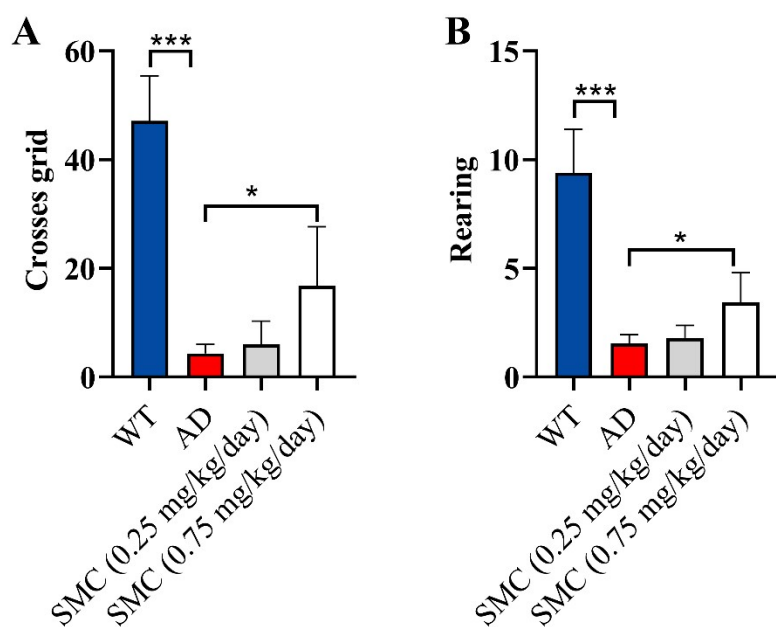

**Figure S4** Effects of SMC on the depression- and anxiety-related behavior including the number of crosses grid, frequencies of rearing of 12-month-old AD mice are assessed by the open-field test. (means  $\pm$  SEMs), \* $p$  < 0.05,  $n$  = 10.
