# Supplementary material for: Se-methylselenocysteine ameliorates mitochondrial function by targeting both mitophagy and autophagy in the mouse model of Alzheimer's disease
Source: Royal Society of Chemistry journal article supplement (doi:10.1039/d4fo00520a), 2024-01-01

Lanes order of mouse brain samples, from left to right: Marker, AD1, AD2, AD3, AD4, AD5, AD+SMC1, AD+SMC2, AD+SMC3, AD+SMC4, AD+SMC5, Marker, Marker. Markers are sometimes not visible.

Fig 3A Original data for Western blot

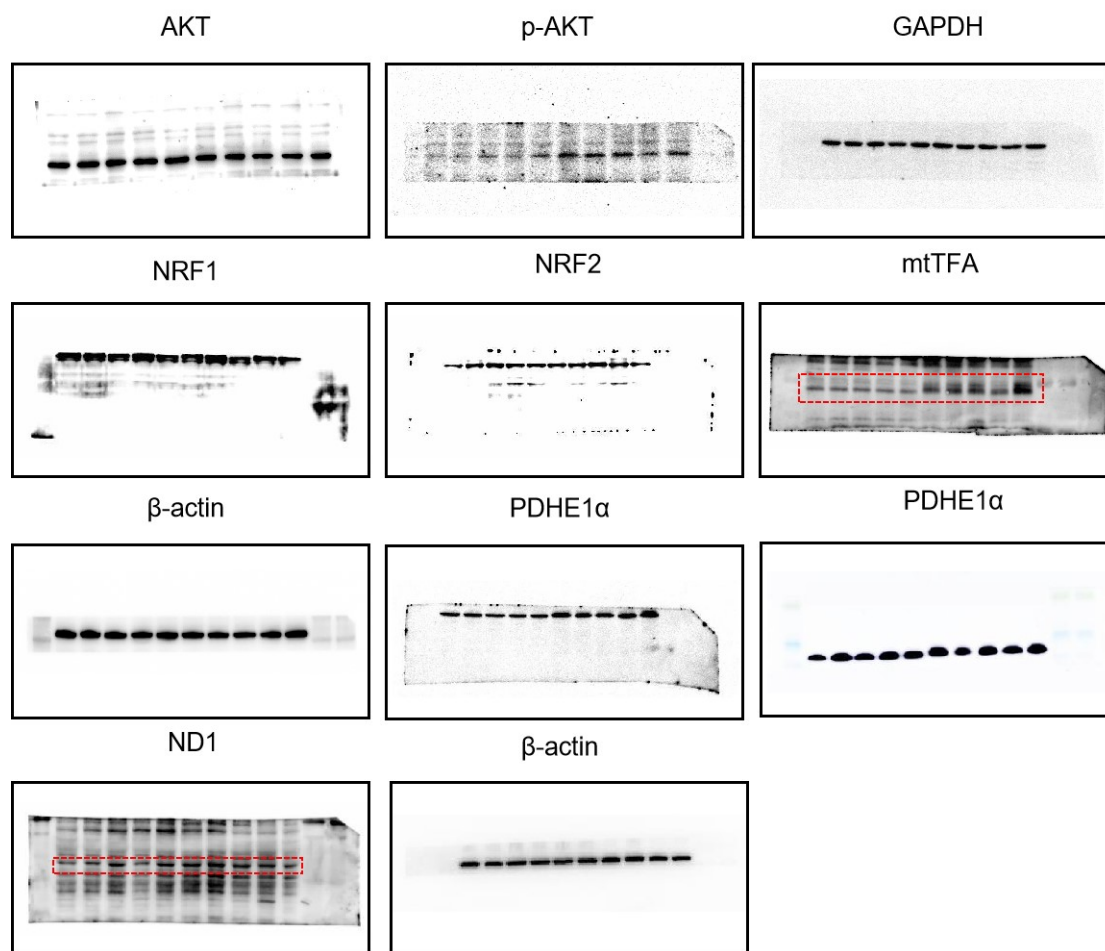

Fig 4 A Original data for Western blot

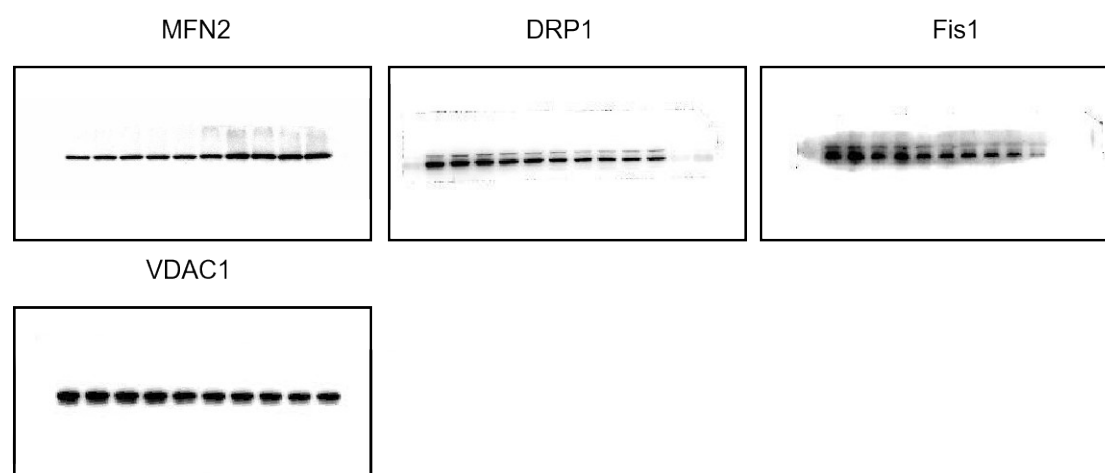

Fig 6A Original data for Western blot

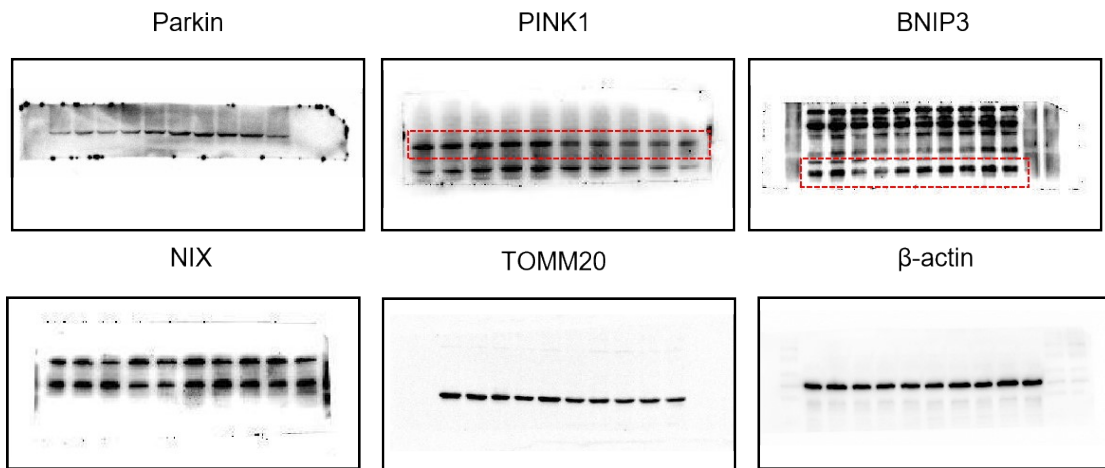

Fig 8A Original data for Western blot

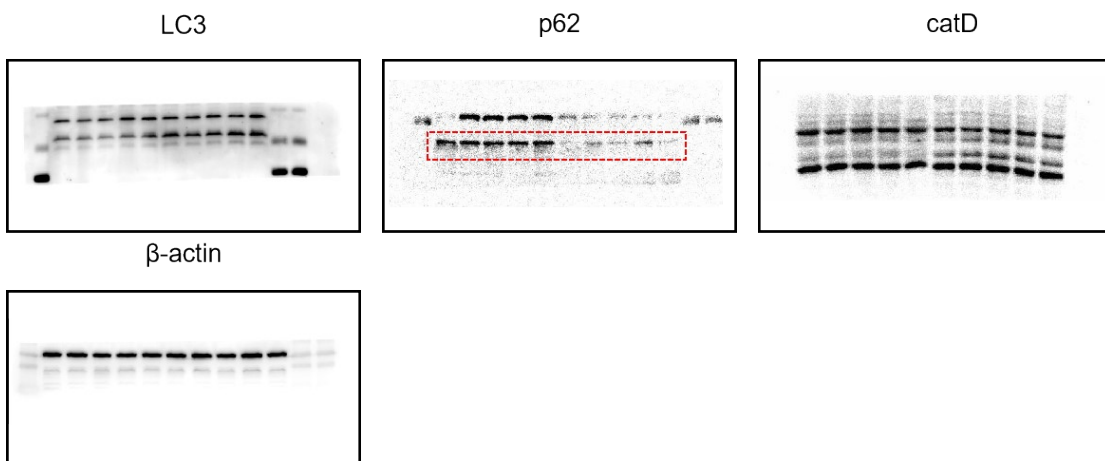

Fig 8C Original data for Western blot

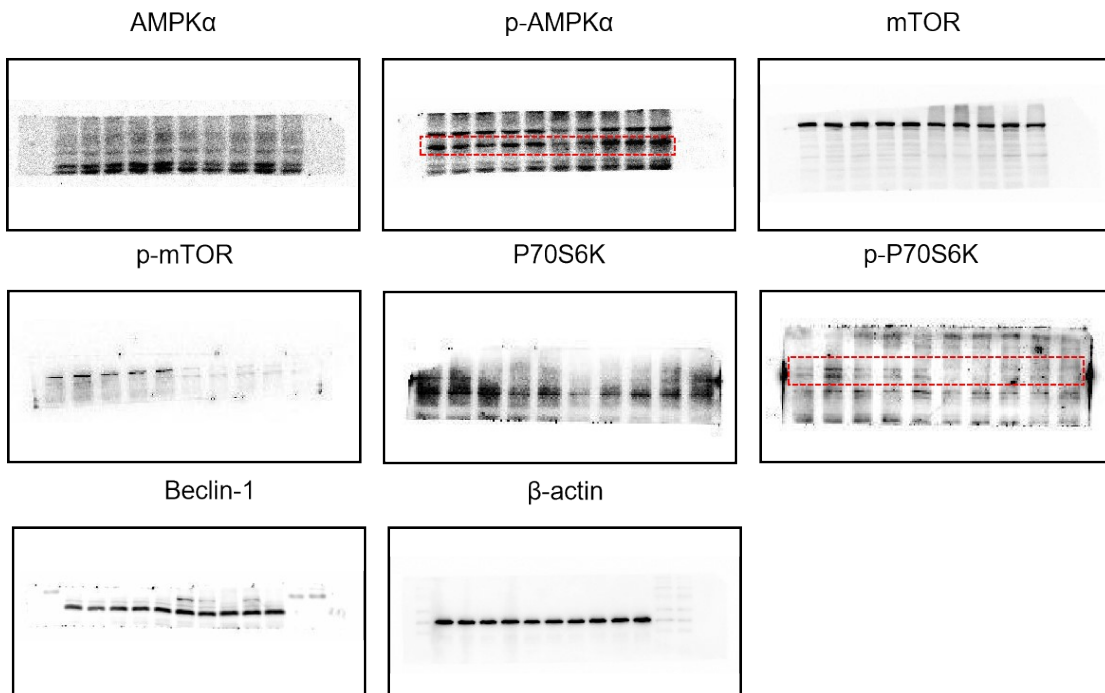

Supplement: d4fo00520a7.pdf [file d4fo00520a7.pdf]
