# Supplementary figures and images for: Se-methylselenocysteine ameliorates mitochondrial function by targeting both mitophagy and autophagy in the mouse model of Alzheimer's disease
Source: Royal Society of Chemistry journal article supplement (doi:10.1039/d4fo00520a), 2024-01-01

**A**

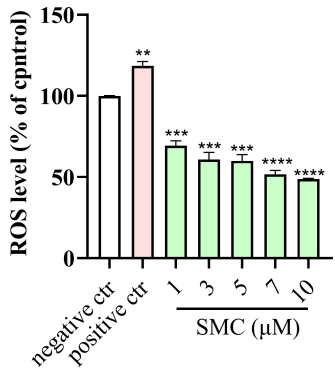

**B**

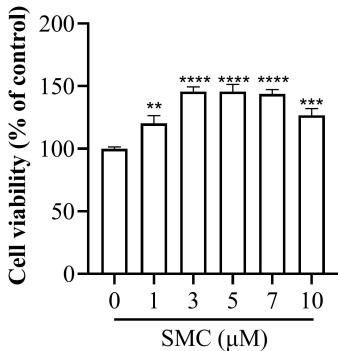

Supplement: d4fo00520a3.pdf [file d4fo00520a3.pdf]

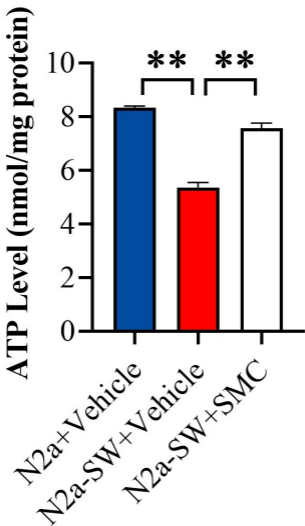

Supplement: d4fo00520a4.pdf [file d4fo00520a4.pdf]

A

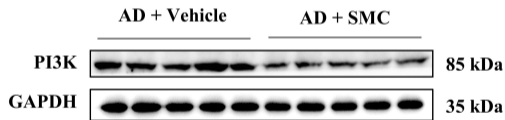

B

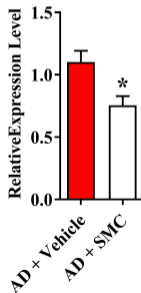

Supplement: d4fo00520a5.pdf [file d4fo00520a5.pdf]

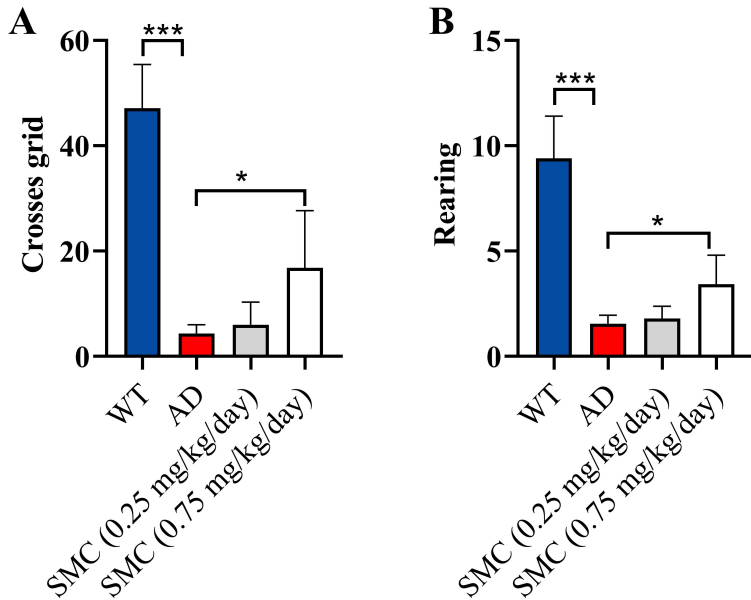

Supplement: d4fo00520a6.pdf [file d4fo00520a6.pdf]
